# Supplementary material for: Decisive role of water and protein dynamics in residence time of p38α MAP kinase inhibitors
Source: PubMed Central journal article supplement (PMC8799644; doi:10.1038/s41467-022-28164-4), 2022-01-28
Supplement: 41467_2022_28164_MOESM3_ESM.pdf [file 41467_2022_28164_MOESM3_ESM.pdf]

Corresponding author(s):

Last updated by author(s): YYYY-MM-DD

## Reporting Summary

Nature Portfolio wishes to improve the reproducibility of the work that we publish. This form provides structure for consistency and transparency in reporting. For further information on Nature Portfolio policies, see our [Editorial Policies](#) and the [Editorial Policy Checklist](#).

### Statistics

For all statistical analyses, confirm that the following items are present in the figure legend, table legend, main text, or Methods section.

n/a Confirmed

- |                                     |                                     |                                                                                                                                                                                                                                                            |
|-------------------------------------|-------------------------------------|------------------------------------------------------------------------------------------------------------------------------------------------------------------------------------------------------------------------------------------------------------|
| <input type="checkbox"/>            | <input checked="" type="checkbox"/> | The exact sample size ( $n$ ) for each experimental group/condition, given as a discrete number and unit of measurement                                                                                                                                    |
| <input type="checkbox"/>            | <input checked="" type="checkbox"/> | A statement on whether measurements were taken from distinct samples or whether the same sample was measured repeatedly                                                                                                                                    |
| <input type="checkbox"/>            | <input checked="" type="checkbox"/> | The statistical test(s) used AND whether they are one- or two-sided<br><i>Only common tests should be described solely by name; describe more complex techniques in the Methods section.</i>                                                               |
| <input checked="" type="checkbox"/> | <input type="checkbox"/>            | A description of all covariates tested                                                                                                                                                                                                                     |
| <input type="checkbox"/>            | <input checked="" type="checkbox"/> | A description of any assumptions or corrections, such as tests of normality and adjustment for multiple comparisons                                                                                                                                        |
| <input type="checkbox"/>            | <input checked="" type="checkbox"/> | A full description of the statistical parameters including central tendency (e.g. means) or other basic estimates (e.g. regression coefficient) AND variation (e.g. standard deviation) or associated estimates of uncertainty (e.g. confidence intervals) |
| <input type="checkbox"/>            | <input checked="" type="checkbox"/> | For null hypothesis testing, the test statistic (e.g. $F$ , $t$ , $r$ ) with confidence intervals, effect sizes, degrees of freedom and $P$ value noted<br><i>Give <math>P</math> values as exact values whenever suitable.</i>                            |
| <input checked="" type="checkbox"/> | <input type="checkbox"/>            | For Bayesian analysis, information on the choice of priors and Markov chain Monte Carlo settings                                                                                                                                                           |
| <input checked="" type="checkbox"/> | <input type="checkbox"/>            | For hierarchical and complex designs, identification of the appropriate level for tests and full reporting of outcomes                                                                                                                                     |
| <input checked="" type="checkbox"/> | <input type="checkbox"/>            | Estimates of effect sizes (e.g. Cohen's $d$ , Pearson's $r$ ), indicating how they were calculated                                                                                                                                                         |

*Our web collection on [statistics for biologists](#) contains articles on many of the points above.*

### Software and code

Policy information about [availability of computer code](#)

Data collection: Maestro (versions 2018-4 and 2020-2) (Schrödinger, LLC, New York, NY, 2020)

Data analysis: Maestro version 2020-2 (Schrödinger, LLC, New York, NY, 2020); trajectory\_asl\_monitor.py script (Schrödinger LLC); event\_analysis.py (Schrödinger LLC); analyze\_simulation.py (Schrödinger LLC); Simulation Interaction Analysis tool (Schrödinger LLC); PyEMMA 2.5.7; Jupyter notebooks used for MSM generation with PyEMMA2 are freely available at <https://doi.org/10.5281/zenodo.5770578>  
Graphpad Prism version 7.0.0 for Windows (GraphPad Software, San Diego, CA, USA)  
MetaXpress® Custom Module Editor Software (64 bit, 6.2.3.733, Molecular Devices)

For manuscripts utilizing custom algorithms or software that are central to the research but not yet described in published literature, software must be made available to editors and reviewers. We strongly encourage code deposition in a community repository (e.g. GitHub). See the Nature Portfolio [guidelines for submitting code & software](#) for further information.

### Data

Policy information about [availability of data](#)

All manuscripts must include a [data availability statement](#). This statement should provide the following information, where applicable:

- Accession codes, unique identifiers, or web links for publicly available datasets
- A description of any restrictions on data availability
- For clinical datasets or third party data, please ensure that the statement adheres to our [policy](#)

The original Desmond raw-trajectories, PDB-coordinates for the energy minimized metastable state derived structures and raw-trajectories of the well-tempered metadynamics simulations generated and analysed during the current study have been deposited in the Zenodo repository and are freely available at: <https://doi.org/10.5281/zenodo.4568113> (compound 1); <https://doi.org/10.5281/zenodo.4572444> (compound 1); <https://doi.org/10.5281/zenodo.4561797> (compound 1)

2); <https://doi.org/10.5281/zenodo.4563896> (compound 2); <https://doi.org/10.5281/zenodo.5563359> (SB203580); <https://doi.org/10.5281/zenodo.5563655> (SB203580); <https://doi.org/10.5281/zenodo.5564118> (compound 1 simulated in compound 2 metastable state 2-S3); <https://doi.org/10.5281/zenodo.5564208> (compound 1 simulated in compound 2 metastable state 2-S3; dataset: VIII); <https://doi.org/10.5281/zenodo.5564586> (well-tempered metadynamics simulations of compounds 1 and 2); <https://doi.org/10.5281/zenodo.5570882> (well-tempered metadynamics simulations of compounds 1 and 2) <https://doi.org/10.5281/zenodo.5571352> (well-tempered metadynamics simulations of compounds 1 and 2). Other data generated in this study are provided in the Supplementary Information and Source data file.  
 3que [<http://doi.org/10.2210/pdb3QUE/pdb>]  
 5tbe [<http://doi.org/10.2210/pdb5TBE/pdb>]  
 6zqs [<http://doi.org/10.2210/pdb6ZQS/pdb>]

## Field-specific reporting

Please select the one below that is the best fit for your research. If you are not sure, read the appropriate sections before making your selection.

Life sciences  Behavioural & social sciences  Ecological, evolutionary & environmental sciences

For a reference copy of the document with all sections, see [nature.com/documents/nr-reporting-summary-flat.pdf](https://www.nature.com/documents/nr-reporting-summary-flat.pdf)

## Life sciences study design

All studies must disclose on these points even when the disclosure is negative.

|                 |                                                                                                                                                                                                                                                                                                                                                                                                                                                                                                                                                                                              |
|-----------------|----------------------------------------------------------------------------------------------------------------------------------------------------------------------------------------------------------------------------------------------------------------------------------------------------------------------------------------------------------------------------------------------------------------------------------------------------------------------------------------------------------------------------------------------------------------------------------------------|
| Sample size     | Sample sizes of 300 - 1000 cell per analyzed measurements were chosen as those are sufficient for statistical analysis. Any details on statistics are given in the method section.                                                                                                                                                                                                                                                                                                                                                                                                           |
| Data exclusions | As stated, cells with ratios within the 10 - 90 percentiles of all measured cells were taken into account for statistical analysis.                                                                                                                                                                                                                                                                                                                                                                                                                                                          |
| Replication     | All cellular experiments were performed in 3 individual replicates and 300 - 1000 cells were analyzed for each condition. All replications were successful.<br>MD simulations were run in 1–15 replicates for each individual starting configurations (see details in Supplementary Figures 34 and 35), a few short simulations failed during the run due to a technical error at the supercomputer (these were not repeated); well-tempered metadynamics simulations were conducted with 20 independent replicates for each MSM derived structures, with all replications being successful. |
| Randomization   | Since we used cells stably expressing MK2-GFP, all cells within the 10 - 90 percentiles were taken into account. Thus, randomization was not applicable.                                                                                                                                                                                                                                                                                                                                                                                                                                     |
| Blinding        | Investigators were not blinded. Cells were subjected to automated quantitative measurements of the distribution of the fluorescent signal, therefore results were not affected by subjective bias.                                                                                                                                                                                                                                                                                                                                                                                           |

## Reporting for specific materials, systems and methods

We require information from authors about some types of materials, experimental systems and methods used in many studies. Here, indicate whether each material, system or method listed is relevant to your study. If you are not sure if a list item applies to your research, read the appropriate section before selecting a response.

### Materials & experimental systems

| n/a                                 | Involved in the study                                     |
|-------------------------------------|-----------------------------------------------------------|
| <input checked="" type="checkbox"/> | <input type="checkbox"/> Antibodies                       |
| <input type="checkbox"/>            | <input checked="" type="checkbox"/> Eukaryotic cell lines |
| <input checked="" type="checkbox"/> | <input type="checkbox"/> Palaeontology and archaeology    |
| <input checked="" type="checkbox"/> | <input type="checkbox"/> Animals and other organisms      |
| <input checked="" type="checkbox"/> | <input type="checkbox"/> Human research participants      |
| <input checked="" type="checkbox"/> | <input type="checkbox"/> Clinical data                    |
| <input checked="" type="checkbox"/> | <input type="checkbox"/> Dual use research of concern     |

### Methods

| n/a                                 | Involved in the study                           |
|-------------------------------------|-------------------------------------------------|
| <input checked="" type="checkbox"/> | <input type="checkbox"/> ChIP-seq               |
| <input checked="" type="checkbox"/> | <input type="checkbox"/> Flow cytometry         |
| <input checked="" type="checkbox"/> | <input type="checkbox"/> MRI-based neuroimaging |

## Eukaryotic cell lines

---

Policy information about [cell lines](#)

|                                                                      |                                                                                                                                                                                                 |
|----------------------------------------------------------------------|-------------------------------------------------------------------------------------------------------------------------------------------------------------------------------------------------|
| Cell line source(s)                                                  | DLD1 cells were obtained from ATCC (CCL-221), HCT116 cells were obtained from ATCC (CCL-247)                                                                                                    |
| Authentication                                                       | Since this study does not include cell line specific analysis, all cell lines were used without additional authentication.                                                                      |
| Mycoplasma contamination                                             | Both cell lines were tested negative for mycoplasma using the PCR mycoplasma kit Venor GeM Classic (Minerva Biolabs, cat # 11-1025) and the Taq DNA Polymerase (Minerva Biolabs, cat # 53-0100) |
| Commonly misidentified lines<br>(See <a href="#">ICLAC</a> register) | No commonly misidentified cell lines were used in the study.                                                                                                                                    |
